# Supplementary material for: Sol–gel copper chromium delafossite thin films as stable oxide photocathodes for water splitting
Source: Royal Society of Chemistry journal article supplement (doi:10.1039/c5ta05227k), 2015-01-01
Supplement: c5ta05227k1.pdf [file c5ta05227k1.pdf]

## ELECTRONIC SUPPLEMENTARY INFORMATION

### **Sol-gel copper chromium delafossite thin films as stable oxide photocathodes for water splitting**

Ana Korina Díaz-García, Teresa Lana-Villarreal, Roberto Gómez\*

*Institut Universitari d'Electroquímica i Departament de Química Física, Universitat d'Alacant,  
Apartat 99, E-03080 Alicante, Spain*

E-mail: [Roberto.Gomez@ua.es](mailto:Roberto.Gomez@ua.es)

1. Experimental details
2. UV-vis absorbance spectrum for an FTO/CuCrO<sub>2</sub> electrode
3. Additional SEM image for an FTO/CuCrO<sub>2</sub> electrode
4. Linear scan voltammograms under transient illumination and photocurrent transients under 1 sun in 0.1 M HClO<sub>4</sub>.
5. Linear scan voltammograms under transient illumination in 0.1 M NaOH.
6. Long-term chronoamperometric experiments under transient illumination in 0.1 M HClO<sub>4</sub> and 0.1 M NaOH.

## 1. Experimental details

CuCrO<sub>2</sub> thin films were prepared on commercial fluorine-doped tin oxide (FTO) glass substrates by a sol-gel method. According to the literature [32], Cu(CH<sub>3</sub>COO)<sub>2</sub>·H<sub>2</sub>O (0.002 mol, purity 99.99%+, Aldrich Chem. Co.) and Cr(NO<sub>3</sub>)<sub>3</sub>·9H<sub>2</sub>O (0.002 mol, purity 99%, Aldrich Chem. Co.) were dissolved in 8 mL of ethanol, and triethanolamine (0.004 mol, purity 98%, Aldrich Chem. Co.) was added to the solution. This precursor solution was stable indefinitely. It was spin-coated on FTO at 1500 rpm for 15 s. The resulting samples were annealed at 400 °C in air for 1 h with a heating rate of 5 °C/min. Such a deposition procedure was repeated four times. Finally, the samples were post-annealed at 650 °C in an N<sub>2</sub> atmosphere for 2 h (with a heating rate of 5 °C/min).

A Bruker D8-Advance X-ray diffractometer operating with Cu-K $\alpha$  radiation ( $\lambda=0.154\text{nm}$ ) at 40 kV and 40 mA was used to determine the X-ray diffraction pattern. The grazing incidence operating mode was used with an incidence angle of 0.25° and a sampled step size of 0.013° within  $2\theta=10^\circ-70^\circ$ . The surface morphology of the films was analyzed using a JEOL JEM-1400 field emission scanning electron microscope (FE-SEM). Photoelectrochemical measurements were performed at room temperature using a three-electrode cell with a fused silica window and a computer-controlled Autolab PGSTAT30 potentiostat. In all the cases, an Ag/AgCl/KCl(sat) electrode and a Pt wire were employed as a reference and as a counter electrode, respectively. Potentials are referred either to the Ag/AgCl/KCl(sat) electrode or to the RHE. Three different working electrolytes were used: 0.1 M HClO<sub>4</sub> solution, 0.1 M acetate/acetic acid buffer solution (pH=4.6) and 0.1 M NaOH, all of them prepared with ultrapure water and purged with either N<sub>2</sub> or O<sub>2</sub> before the measurements. Cyclic voltammograms were obtained in the dark at a scan rate of 20 mV·s<sup>-1</sup>. An ozone-free 300 W Xe arc lamp (Thermo Oriel) was employed for electrode illumination (equipped with a water filter). The electrode was illuminated from the electrolyte side (EE illumination). The light intensity was measured by coupling an optical power meter (Thorlabs model PM100D) with a thermopile. The typical value of the light intensity on the sample was 0.65 W·cm<sup>-2</sup>. Illumination was also performed with a solar simulator (Abett, 550 W) at 1 sun (AM 1.5).

## 2. UV-vis absorbance spectrum for an FTO/CuCrO<sub>2</sub> electrode

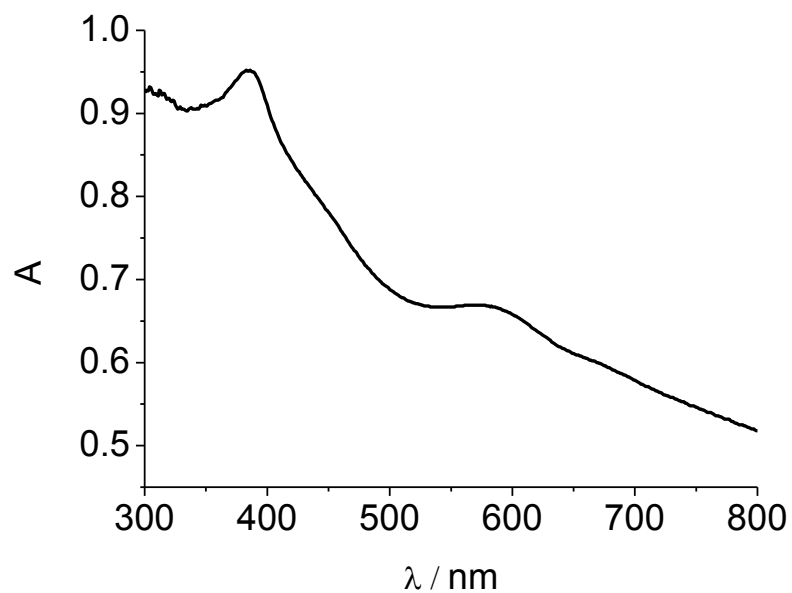

**Figure S1.** UV-visible absorption spectrum for a CuCrO<sub>2</sub> film supported on conducting glass.

## 3. Additional SEM image for an FTO/CuCrO<sub>2</sub> electrode

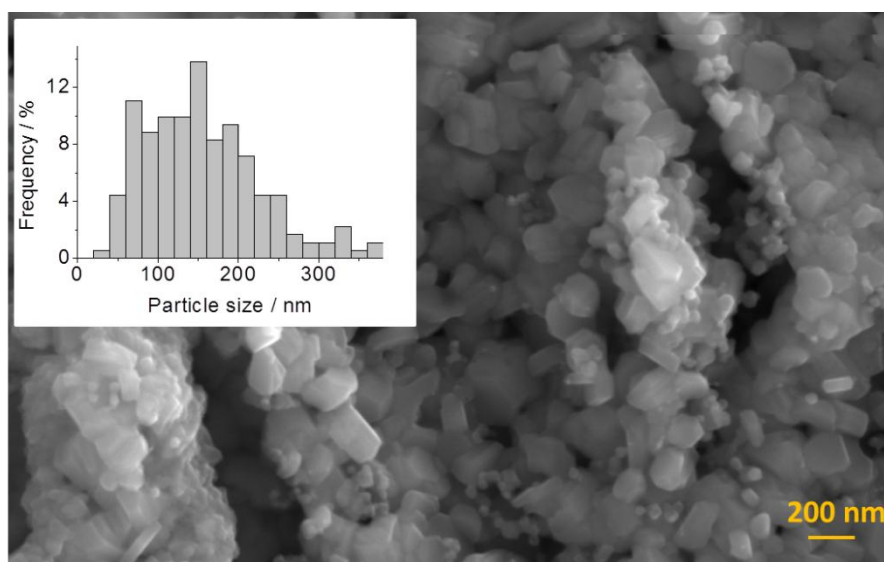

**Figure S2.** SEM image for a CuCrO<sub>2</sub> thin film with a defective region.

**4. Linear scan voltammograms under transient illumination and photocurrent transients under 1 sun in 0.1 M HClO<sub>4</sub>.**

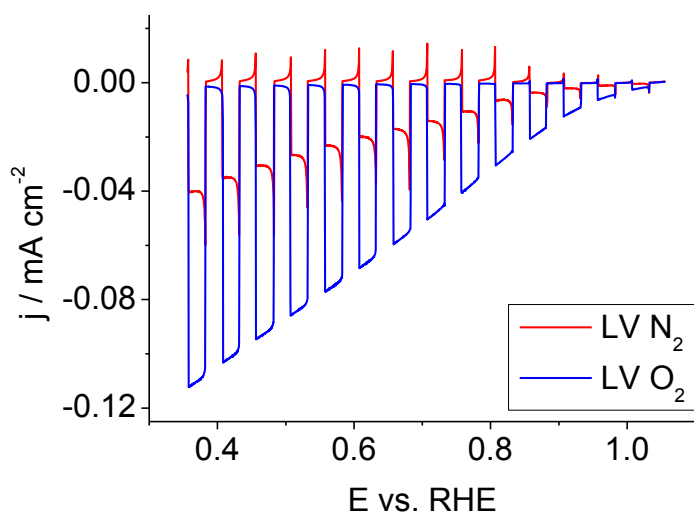

**Figure S3.** Linear scan voltammograms for a CuCrO<sub>2</sub> electrode in 0.1 M HClO<sub>4</sub> purged with either N<sub>2</sub> or O<sub>2</sub> under 1 sun illumination. Scan rate: 5 mV·s<sup>-1</sup>.

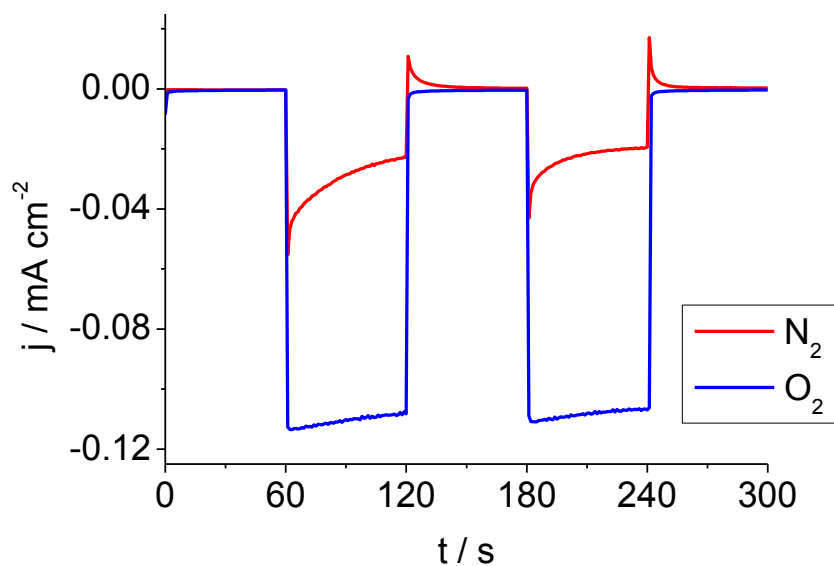

**Figure S4.** Photocurrent transients under 1 sun illumination for an FTO/CuCrO<sub>2</sub> electrode in contact with a 0.1 M HClO<sub>4</sub> purged with either N<sub>2</sub> or O<sub>2</sub>.

## 5. Linear scan voltammograms under transient illumination in 0.1 M NaOH

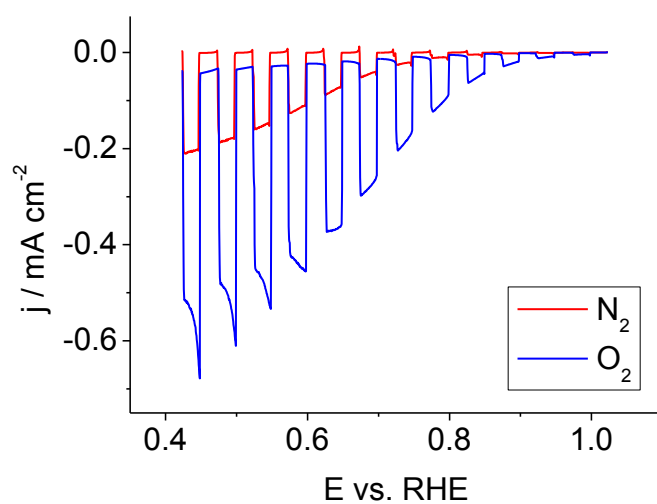

**Figure S5.** Linear scan voltammograms for a  $\text{CuCrO}_2$  electrode in 0.1 M NaOH purged with either  $\text{N}_2$  or  $\text{O}_2$  under transient illumination from an ozone-free Xe arc lamp ( $0.65 \text{ W} \cdot \text{cm}^{-2}$ ). Scan rate:  $5 \text{ mV} \cdot \text{s}^{-1}$ .

**6. Long-term chronoamperometric experiments under transient illumination in 0.1 M HClO<sub>4</sub> and 0.1 M NaOH.**

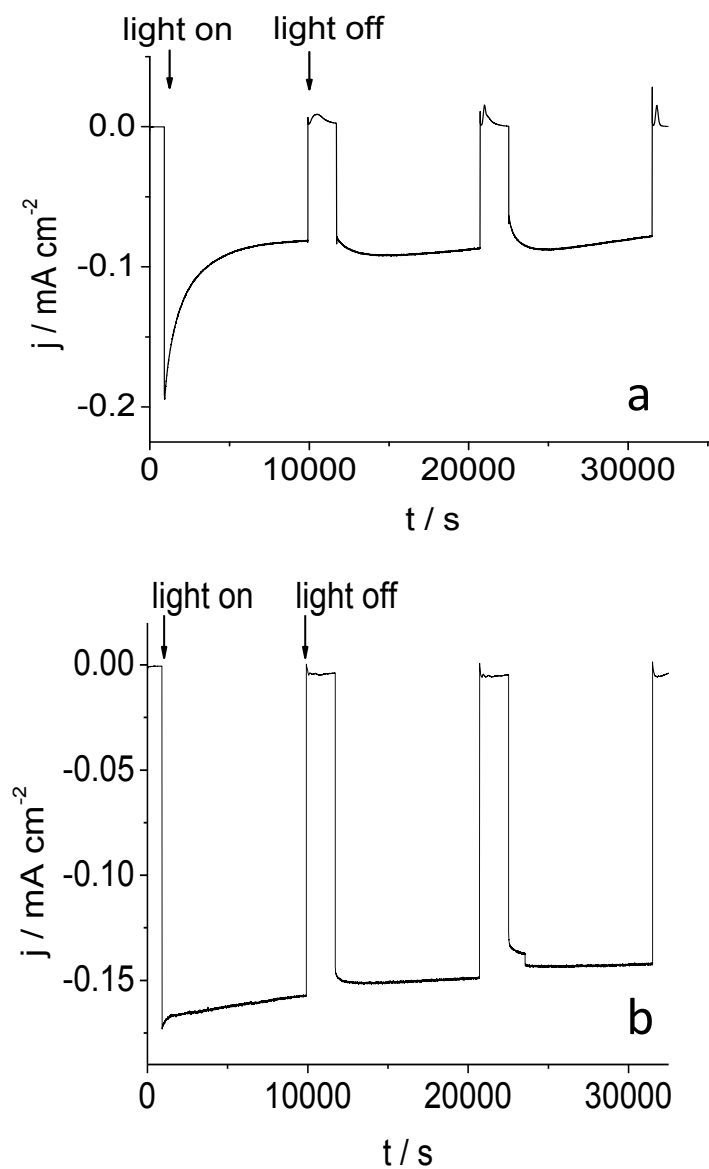

**Figure S6.** Long-term chronoamperometric experiments under transient illumination for FTO/CuCrO<sub>2</sub> electrodes in contact with either (a) N<sub>2</sub>-purged 0.1 M HClO<sub>4</sub> or (b) N<sub>2</sub>-purged 0.1 M NaOH solutions.
